# Supplementary material
Source: PubMed Central journal article supplement (PMC11073030)
Supplement: 18_2022_4640_MOESM1_ESM.pdf [file 18_2022_4640_MOESM1_ESM.pdf]

## **Supplementary Data**

**DNA barcoding and gene expression recording reveal the presence of cancer cells with unique properties during tumor progression**

Yuka Umeki, Noriaki Ogawa, Yuko Uegaki, Kotaro Saga, Yasufumi Kaneda, and Keisuke Nimura

## **Supplementary Figure legends**

### **Figure S1. Evaluation of mutation in stgRNA**

Heatmap depicting mutation rate (deletion, insertion, and mismatch) in each position in stgRNA. NT, non-treatment; DTX, docetaxel treatment; and Sphere, sphere formation

### **Figure S2. The detection rate of mutation in stgRNA in all cells**

The cumulative distribution fraction of insertion and deletion in each sample. NT, non-treatment; DTX, docetaxel treatment; and Sphere, sphere formation

### **Figure S3. The analysis of cellular composition in DU145 cells**

(A) The bubble plot of top 10 barcodes corrected from each of the 21 samples (n = 3 for each sample). The total bubble number is 97 for NANOG #112, 83 for NANOG #128, 99 for POU5F1 #112, 92 for POU5F1 #114, 97 for SOX2 #98, and 94 for SOX2 #101 in each line since there is a redundancy. Bubble size indicates the proportion of the barcode. (B) Heatmap representing JS divergence calculated using top 10 barcodes in each sample or all barcodes. NT, non-treatment; DTX, docetaxel treatment; and Sphere, sphere formation

### **Figure S4. Raw images of Western blots**

**Table S1. The mean significant Spearman's correlations between mutation size of stgRNA and weighted number of cell barcode reads in DU145 cells**

# Figure S1

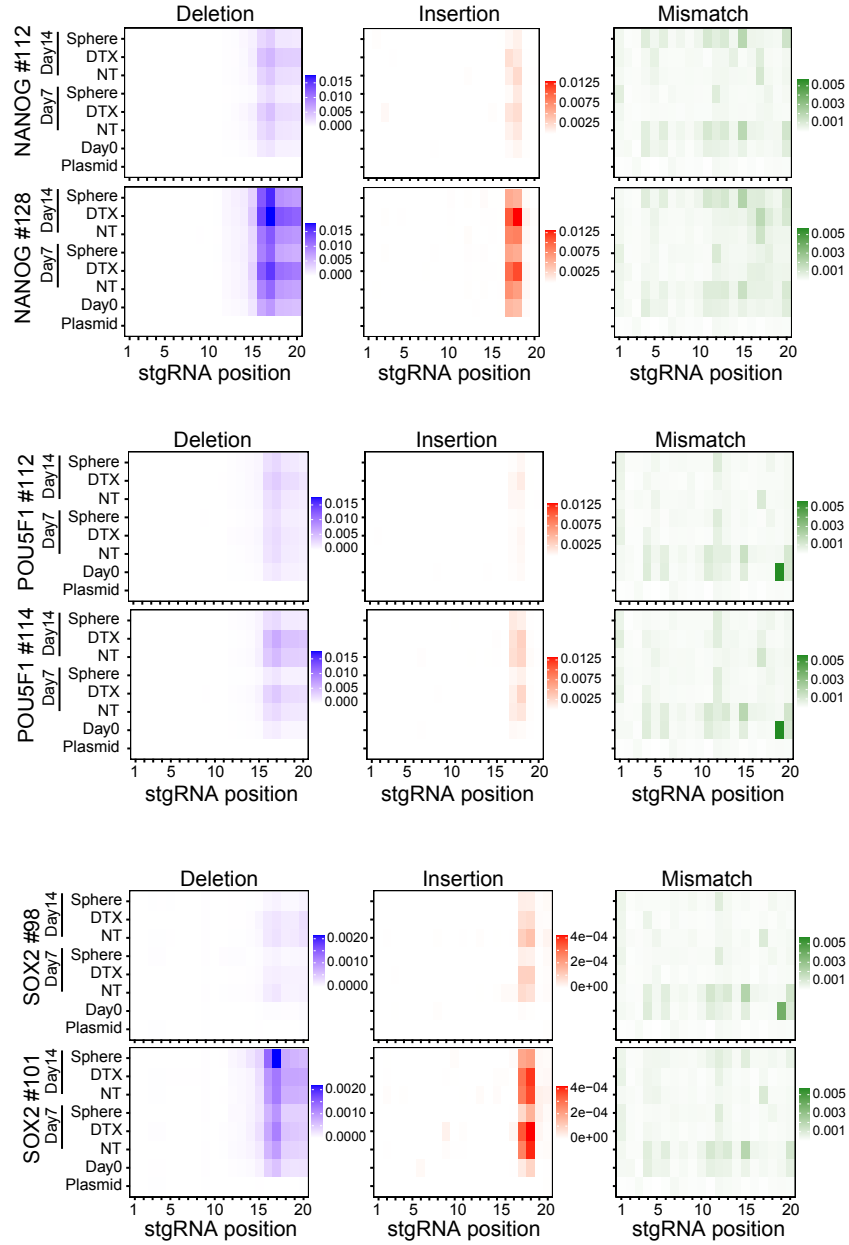

# Figure S2

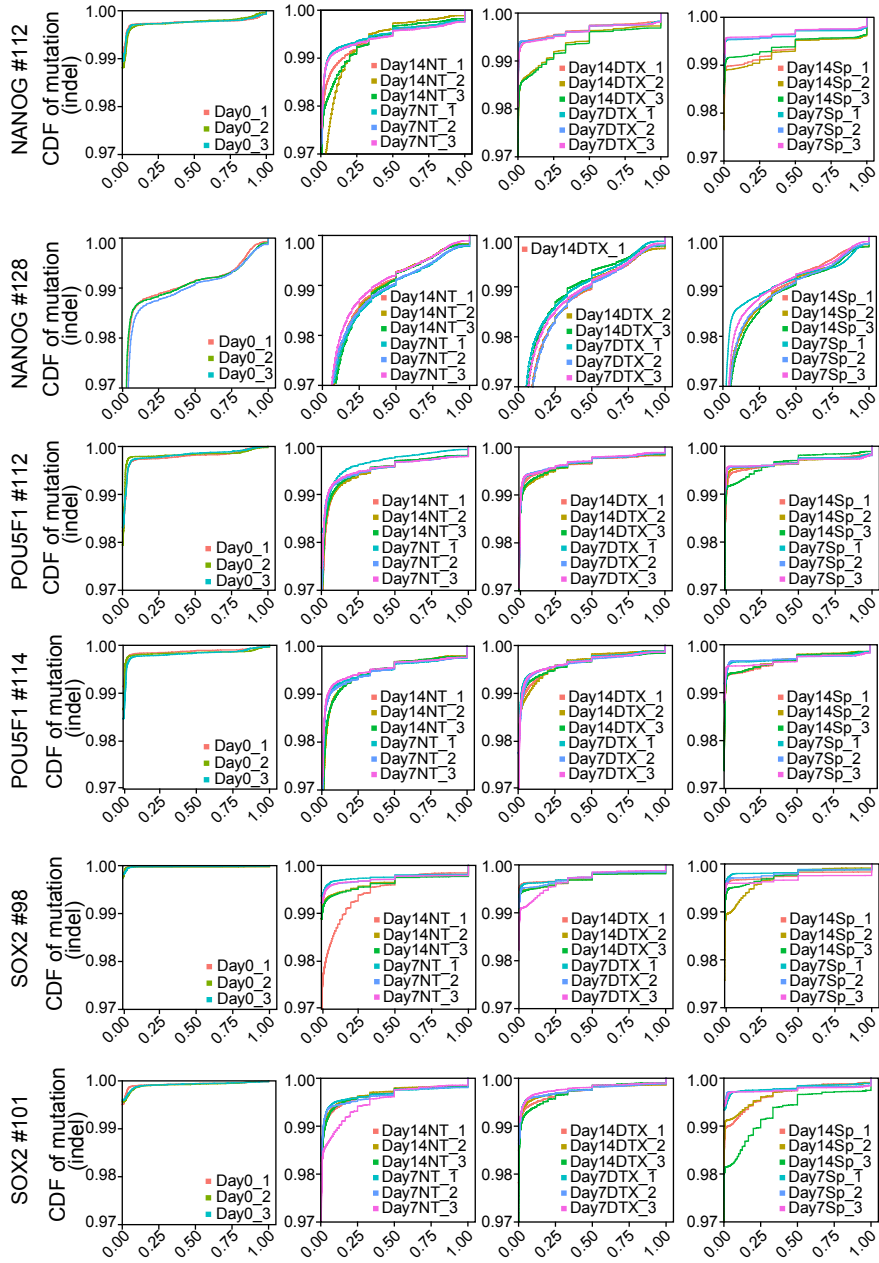

# Figure S3

**A**

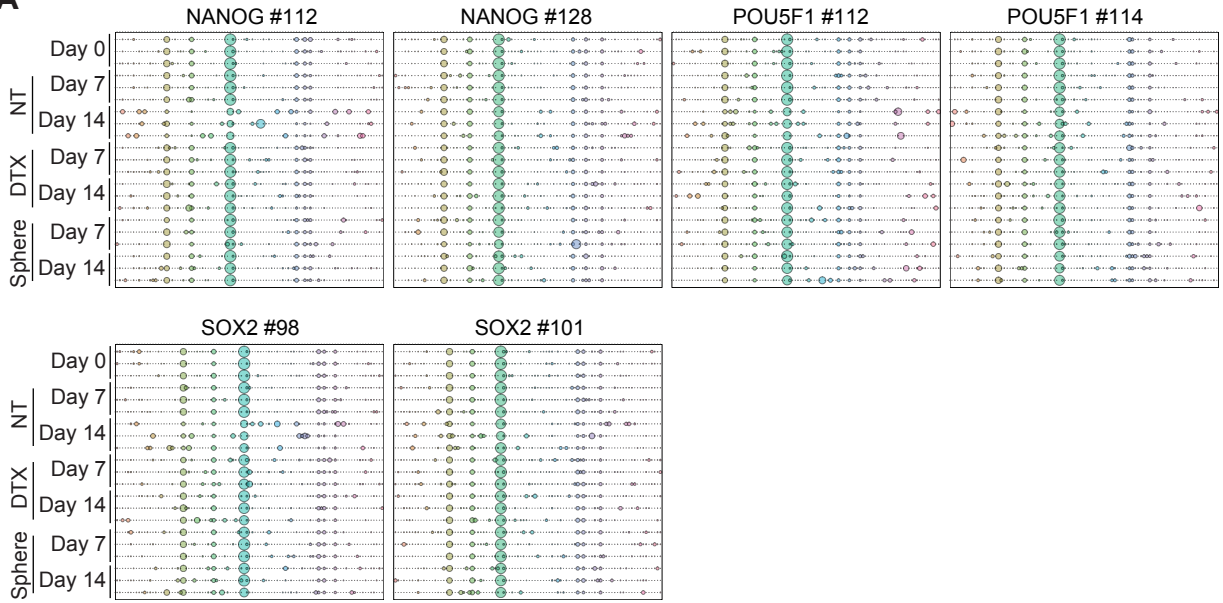

**B** Top 10

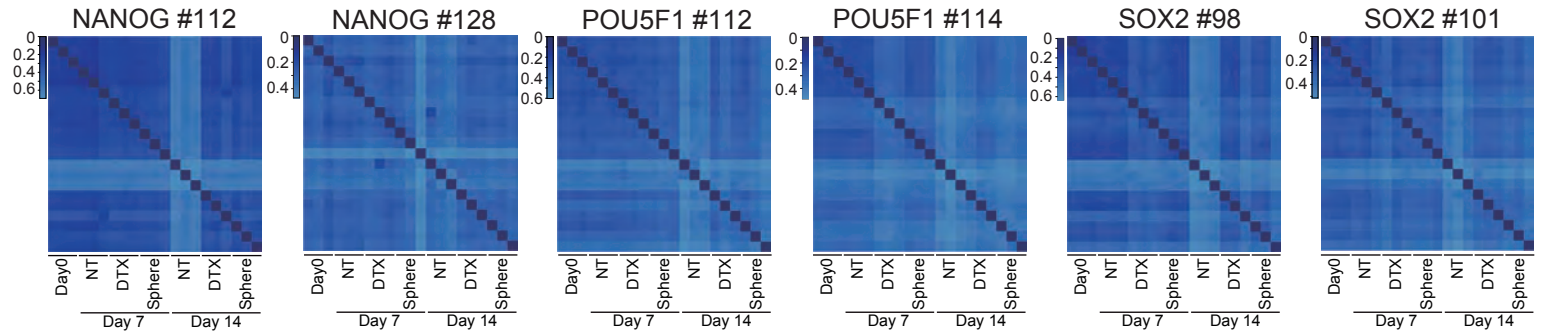

**C** All

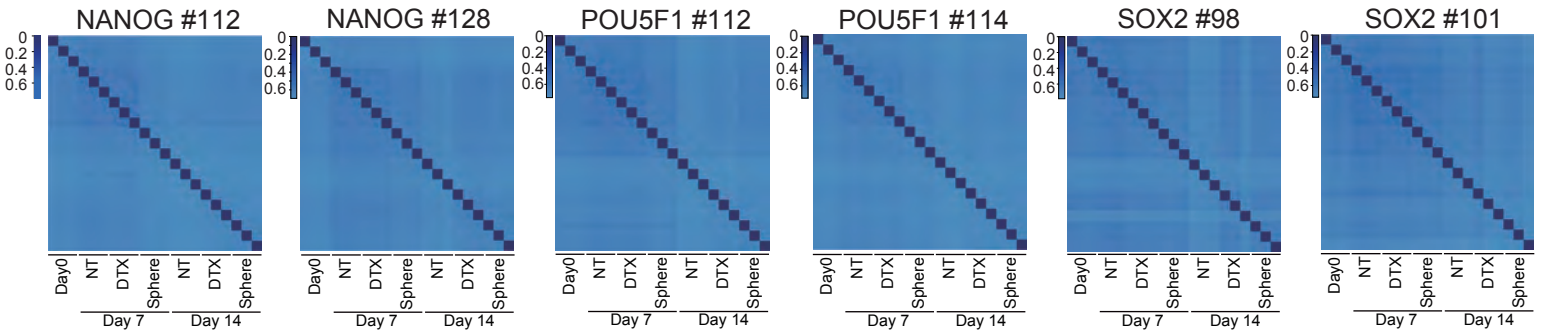

**Figure S4**

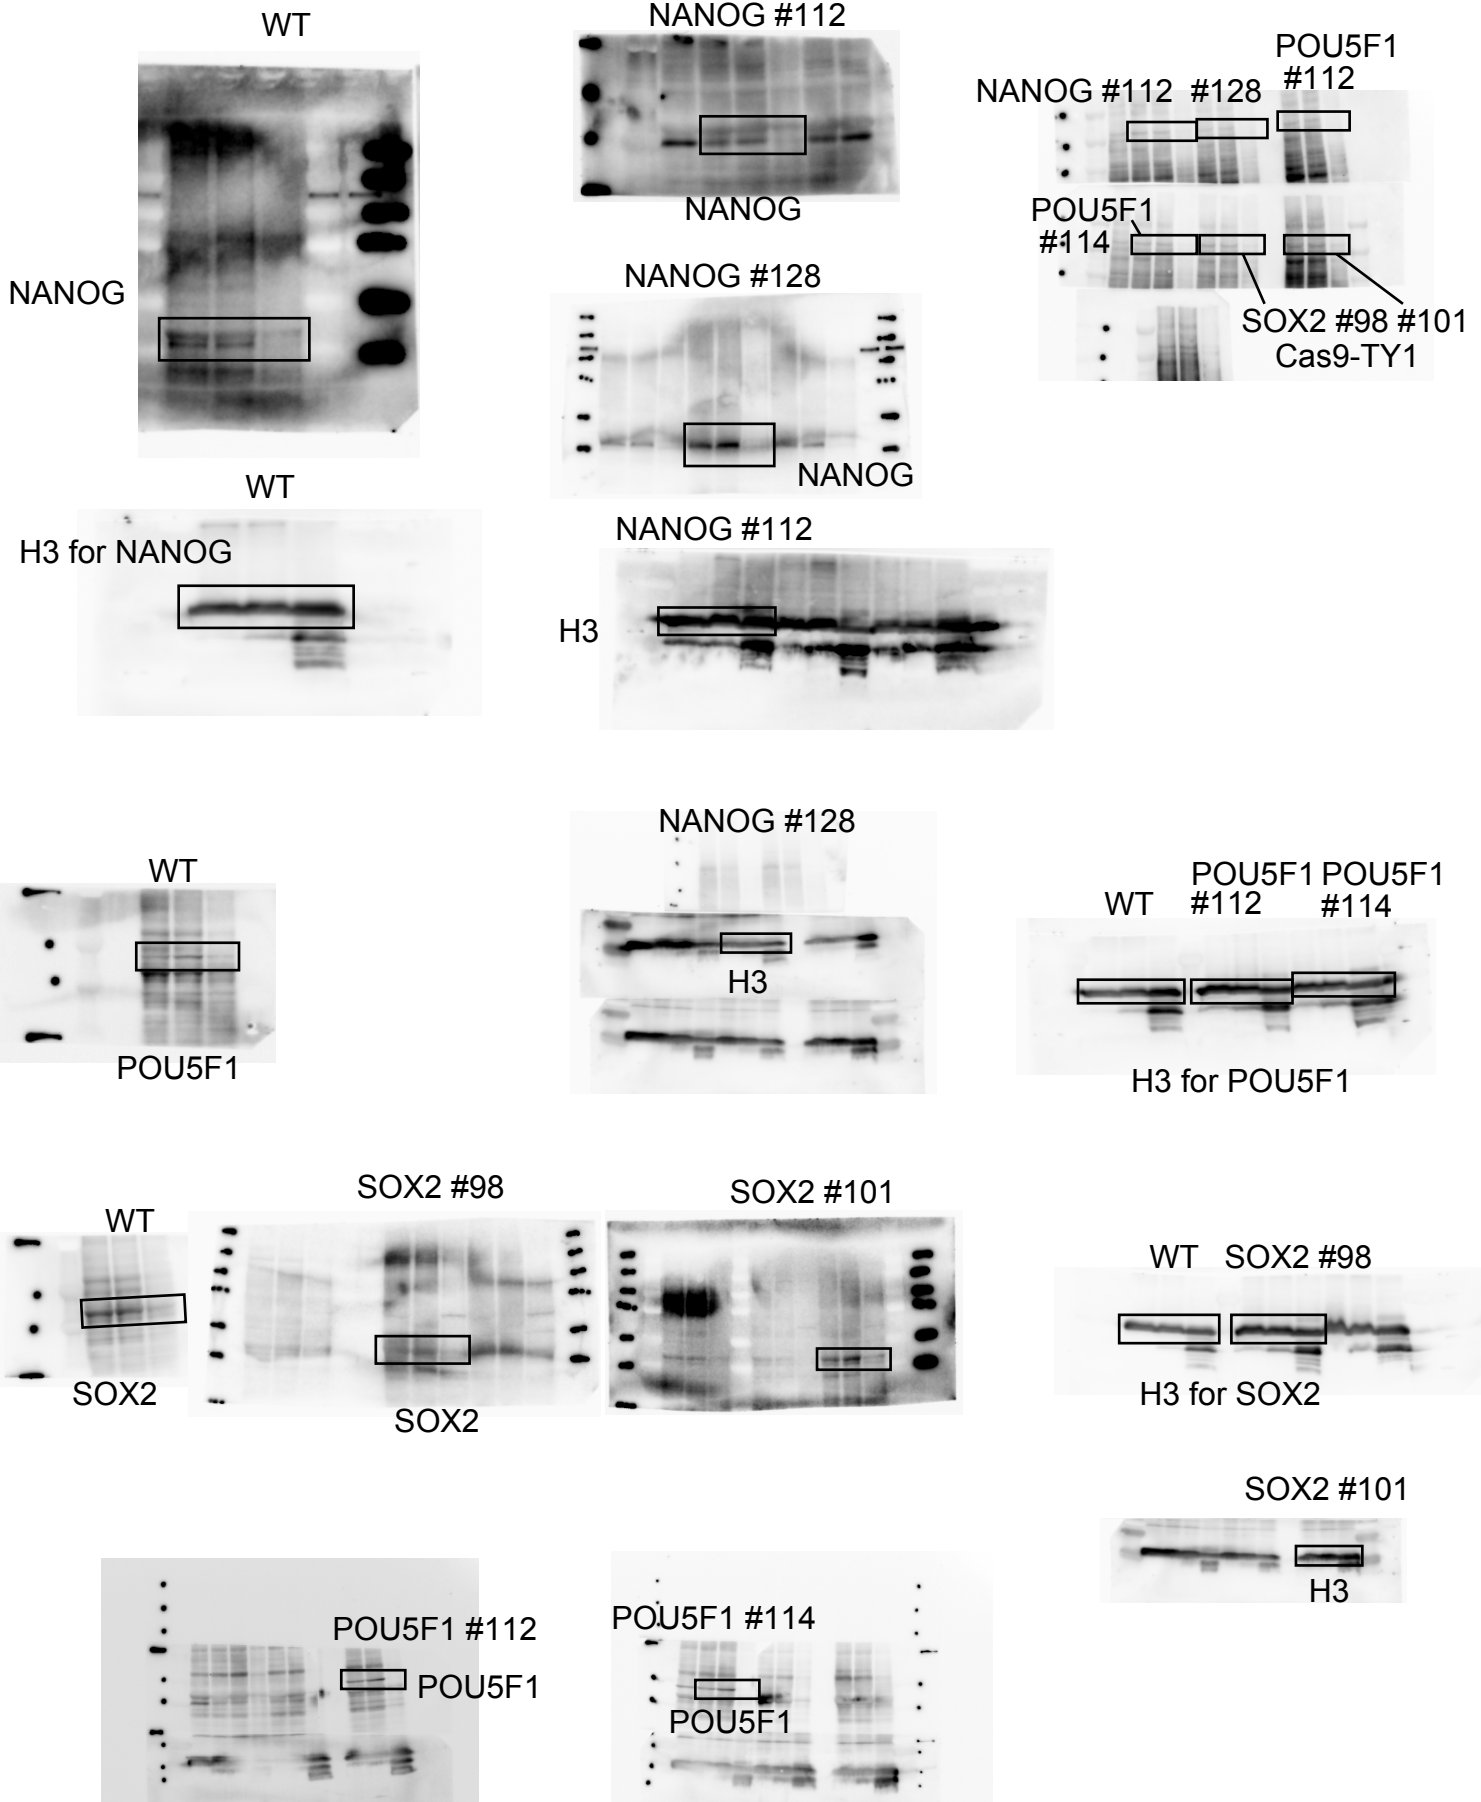

**Table 1. The mean significant Spearman's correlations between mutation size of stgRNA and weighted number of cell barcode reads in DU145 cells**

| NANOG #112   | NT         | DTX        | Sphere     | total      |
|--------------|------------|------------|------------|------------|
| Day 0        | 0.15084268 | -          | -          | 0.15084268 |
| Day 7        | 0.21315188 | 0.25839764 | 0.18485206 | 0.21880053 |
| Day 14       | 0.30707507 | 0.40959186 | 0.21077919 | 0.30914871 |
| Day 7+Day 14 | 0.26011348 | 0.33399475 | 0.19781563 | 0.26397462 |

| NANOG #128   | NT         | DTX        | Sphere     | total      |
|--------------|------------|------------|------------|------------|
| Day 0        | 0.21243562 | -          | -          | 0.21243562 |
| Day 7        | 0.29823256 | 0.34826646 | 0.29545658 | 0.3139852  |
| Day 14       | 0.37051868 | 0.38781393 | 0.40101021 | 0.3864476  |
| Day 7+Day 14 | 0.33437562 | 0.3680402  | 0.34823339 | 0.3502164  |

| POU5F1 #112  | NT         | DTX        | Sphere     | total      |
|--------------|------------|------------|------------|------------|
| Day 0        | 0.20116341 | -          | -          | 0.20116341 |
| Day 7        | 0.22713807 | 0.30403789 | 0.21230744 | 0.2478278  |
| Day 14       | 0.27527996 | 0.45500784 | 0.29374913 | 0.34134564 |
| Day 7+Day 14 | 0.25120902 | 0.37952287 | 0.25302828 | 0.29458672 |

| POU5F1 #114  | NT         | DTX        | Sphere     | total      |
|--------------|------------|------------|------------|------------|
| Day 0        | 0.1767808  | -          | -          | 0.1767808  |
| Day 7        | 0.25948499 | 0.29843192 | 0.19680559 | 0.25157417 |
| Day 14       | 0.4000513  | 0.43264499 | 0.36335375 | 0.39868335 |
| Day 7+Day 14 | 0.32976814 | 0.36553846 | 0.28007967 | 0.32512876 |

| SOX2 #98     | NT         | DTX        | Sphere     | total      |
|--------------|------------|------------|------------|------------|
| Day 0        | 0.13050151 | -          | -          | 0.13050151 |
| Day 7        | 0.17763144 | 0.20721606 | 0.15236738 | 0.17907163 |
| Day 14       | 0.24090878 | 0.34915232 | 0.25964547 | 0.28323552 |
| Day 7+Day 14 | 0.20927011 | 0.27818419 | 0.20600643 | 0.23115358 |

| SOX2 #101    | NT         | DTX        | Sphere     | total      |
|--------------|------------|------------|------------|------------|
| Day 0        | 0.18075414 | -          | -          | 0.18075414 |
| Day 7        | 0.21770528 | 0.21647747 | 0.17719019 | 0.20379098 |
| Day 14       | 0.23513658 | 0.3699066  | 0.29745854 | 0.30083391 |
| Day 7+Day 14 | 0.22642093 | 0.29319203 | 0.23732436 | 0.25231244 |
